# Supplementary material for: Spontaneous formation of a chiral (Mo2O2S2)2+-based cluster driven by dimeric {Te2O6}-based templates
Source: Royal Society of Chemistry journal article supplement (doi:10.1039/c8dt00832a), 2018-01-01
Supplement: c8dt00832a1.pdf [file c8dt00832a1.pdf]

## **Spontaneous Formation of Chiral $(\text{Mo}_2\text{O}_2\text{S}_2)^{2+}$ -based Cluster Driven by Dimeric $\{\text{Te}_2\text{O}_6\}$ Based Templates**

Jamie W. Purcell, De-Liang Long, Edward C. Lee, Leroy Cronin\* and Haralampos N. Miras\*

### **Supporting Information**

Page S2: Experimental

Page S4: Infra-Red Spectroscopy

Page S5: Thermogravimetric Analysis

Page S7: ESI-Mass Spectrometry

Page S13: Crystallographic Data

Page S15: Additional References

## Experimental

All reagents were purchased from Fisher Scientific, Sigma Aldrich and Alfa Aesar and used as provided with no further purification. The  $[\text{Mo}_2\text{O}_2\text{S}_2]^{2+}$  dimeric unit was prepared according to the modified procedure published by Cadôt *et al* in 1998.<sup>1</sup>

**X-Ray Crystallography:** Data were collected at 150(2)K using a Bruker AXS Apex II [ $\lambda(\text{Mo}_{\text{K}\alpha}) = 0.71073 \text{ \AA}$ ] equipped with a graphite monochromator.

Structures were solved using Direct methods with SHELXS-2013<sup>2</sup> and SHELXL<sup>3</sup> using WinGX routines.<sup>4</sup> Refinement was achieved by full-matrix least squares on  $F^2$  via SHELXL-2013. Corrections for incident and diffracted beam absorption effects were applied using analytical methods.<sup>5</sup>

All data manipulation and presentation steps were performed using WinGX. Details of interest about the structure refinement are given in the tables at the end of this document.

The X-ray crystallographic data reported in this article have been deposited at the Crystallographic Data Centres. For compound **1** and **2** the data can be obtained from FIZ Karlsruhe, 76344 Eggenstein-Leopoldshafen, Germany (fax: (+49)7247-808-666; e-mail: [crysdata@fiz-karlsruhe.de](mailto:crysdata@fiz-karlsruhe.de)), on quoting the deposition number CSD-433070 and 433071. For compound **3**, the data can be obtained free of charge from the Cambridge Crystallographic Data Centre via [www.ccdc.cam.ac.uk/data\\_request/cif](http://www.ccdc.cam.ac.uk/data_request/cif) under deposition number CCDC-1550063.

**Fourier Transform Infra-Red Spectroscopy:** Samples were prepared as KBr discs and FT-IR spectra were collected in transmission mode using a Shimadzu IRAffinity-1S Fourier Transform Infra-Red Spectrophotometer. Wavenumbers ( $\nu$ ) are given in  $\text{cm}^{-1}$

**Electrospray Ionisation Mass Spectrometry (ESI-MS)** was performed on a Waters Synapt-G2 HDMS spectrometer operating in sensitivity mode, equipped with a quadrupole and time of flight (Q-ToF) module for MS analysis. All samples were prepared by dissolving in 1:10  $\text{H}_2\text{O}:\text{CH}_3\text{CN}$  (HPLC grade) to a concentration of *ca.*  $1 \times 10^{-5} \text{ M}$  and injected directly at a flow rate of  $5 \mu\text{L min}^{-1}$  using a *Harvard* syringe pump. All spectra were collected in negative ion mode and analysed using the *Waters* MassLynx v4.1 software.

For all measurements the following parameters were employed: capillary voltage: 2.5 kV; sample cone voltage: 10.0 V; extraction cone voltage: 4.0 V; source temperature: 80 °C; desolvation temperature: 180 °C; cone gas flow:  $15 \text{ L h}^{-1} (\text{N}_2)$ ; desolvation gas flow:  $750 \text{ L h}^{-1} (\text{N}_2)$ .

**Thermogravimetric Analysis:** Analysis was performed on a TA Instruments Q500 Thermogravimetric Analyser under nitrogen flow with a typical heating rate of 10° C/min from room temperature up to 800° C, unless otherwise stated

**Elemental Analysis:** Mo, S and Te content were determined by ICP-OES analysis according to the following procedure: 5-10 mg sample material was digested by adding 1 mL deionised water and 2mL conc.  $\text{HNO}_3$  to the sample in a digestion beaker. The sample solution was warmed until clear before being allowed to cool and a further 5mL deionised water added. The resulting solution was transferred quantitatively with washings to an A class 50mL volumetric flask and made up to the mark with deionised water. A blank sample was also prepared simultaneously to account for any

digestion interferences. The samples were transferred to 50mL polypropylene centrifuge tubes and analysed on an Agilent SVDV 5100 ICP-OES using the SVDV mode and appropriate calibration standards.

Carbon and nitrogen content was analysed by the University of Glasgow microanalysis service within the School of Chemistry.

Potassium content was determined using a Corning 410 Flame Photometer using the same samples and calibration standards used in the ICP-OES analysis.

**Synthesis of  $K_3[(Mo_2O_2S_2)_4(TeO_3)(OH)_9] \cdot 20H_2O$ , 1:**  $Na_2TeO_3$  (0.0501 g, 0.226 mmol) was dissolved in 20 mL distilled water to form a clear, colourless solution. Dimeric  $[Mo_2O_2S_2]^{2+}$  (5 mL, 0.68 mmol) was added, upon which the colour of the solution transitioned from colourless, through red and cloudy yellow to black. 1M  $K_2CO_3(aq)$  was used to bring the pH to 5.13, with the colour being a cloudy yellow. The reaction mixture was then stirred at room temperature for 1 hour during which time the pH rose to 6.87. The solution was filtered and kept at 18 °C and after 1 week orange, cubic crystals suitable for X-ray diffraction studies were collected (57.8 mg, 20.67 % based on Mo). Elemental Analysis of  $H_{19}K_3Mo_8O_{25}S_8Te$  (FW: 1688.01): Theoretical (Found)%: Mo 45.46 (44.70), S 15.20 (16.43), Te 7.56 (8.23), K 6.95 (6.10).

**Synthesis of  $K_8[(Mo_2O_2S_2)_{10}(TeO_3)(Te_2O_6)_2(OH)_{18}] \cdot 45H_2O$ , 2:**  $Na_2TeO_3$  (0.05g, 0.226mmol) was dissolved in 20 mL distilled water to form a clear, colourless solution. Addition of 5 mL  $[Mo_2O_2S_2]^{2+}$  (0.68 mmol) followed which resulted in a series of colour change from colourless to cloudy orange to black. The pH of the solution was adjusted to 5.48 with 1M  $K_2CO_3$  after which the reaction mixture turned cloudy yellow. After stirring at room temperature for 1 hour, during which time the pH rose to 7.79, the reaction mixture was filtered and the resulting clear orange solution was stored at 5 °C for 1-2 weeks, after which 64.2 mg orange diamond-shaped plate crystals suitable for X-ray diffraction studies were collected (17.38 % yield based on Mo) Elemental Analysis of  $H_{98}K_8MO_{20}O_{93}S_{20}Te_5$  (FW: 5097.47): Theoretical (Found)%: Mo 37.64 (37.17), S 12.58 (13.16), Te 12.52 (12.80), K 6.14 (6.10).

**Synthesis of  $(NMe_4)K_9[(Mo_2O_2S_2)_{12}(TeO_3)_4(TeO_4)_2(OH)_{18}] \cdot 48H_2O$ , 3:**  $Na_2TeO_3$  (0.055 g, 0.248 mmol) was dissolved in 20 mL distilled water to form a clear, colourless solution. Addition of 5mL  $[Mo_2O_2S_2]^{2+}$  (0.68mmol) followed to give a black colour to the solution. 1M  $K_2CO_3$  was used to adjust the pH to 5.04 with the colour becoming cloudy orange. The reaction mixture was stirred at room temperature for 1 hour, during which time the pH rose to 6.97. The reaction mixture was filtered, resulting in a clear orange solution which was kept at 18 °C. Within one week, triangular orange plate crystals formed that were suitable for X-ray diffraction studies. 65.1 mg material was collected (23.04 % yield based on Mo) Elemental Analysis of  $C_4H_{110}K_9MO_{24}NO_{102}S_{24}Te_6$  (FW: 5994.30): Theoretical (Found)%: Mo 38.41 (38.11), S 12.84 (11.99), Te 12.77 (11.63), K 5.87 (6.03).

## Infra-Red Spectroscopy

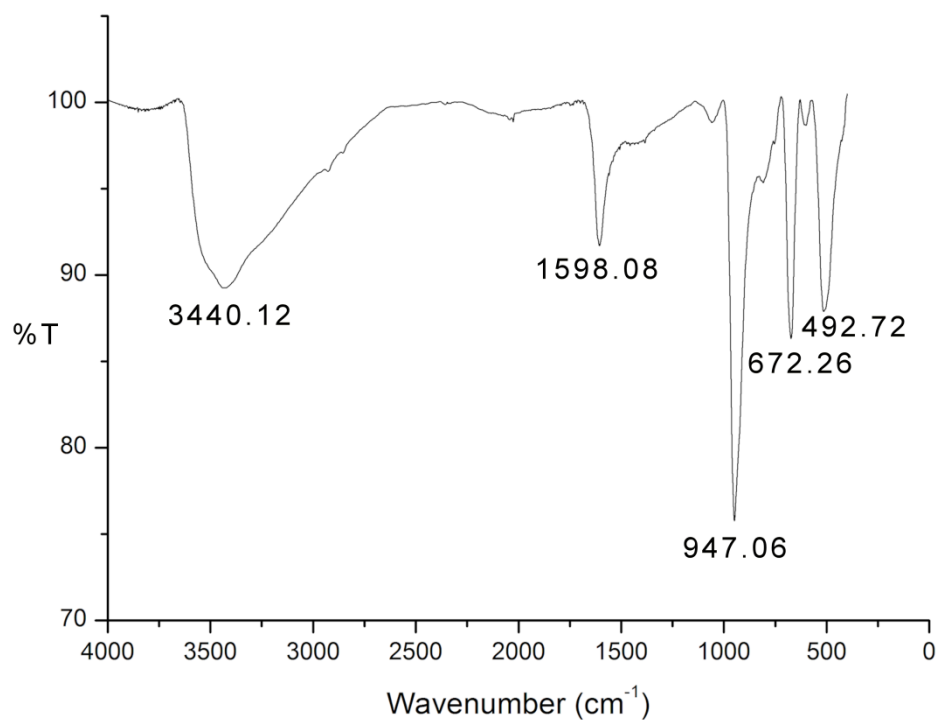

**Figure S1:** FT-IR spectrum of Compound 1

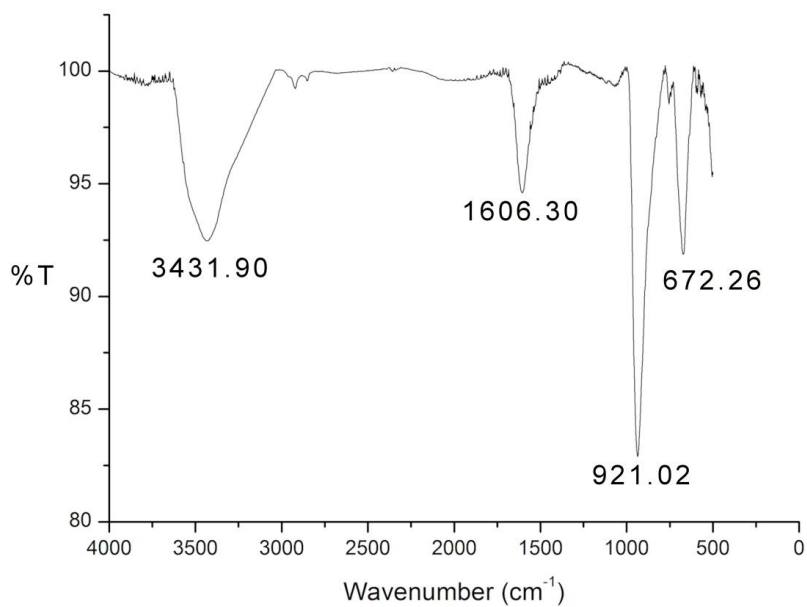

**Figure S2:** FT-IR spectrum of Compound 2

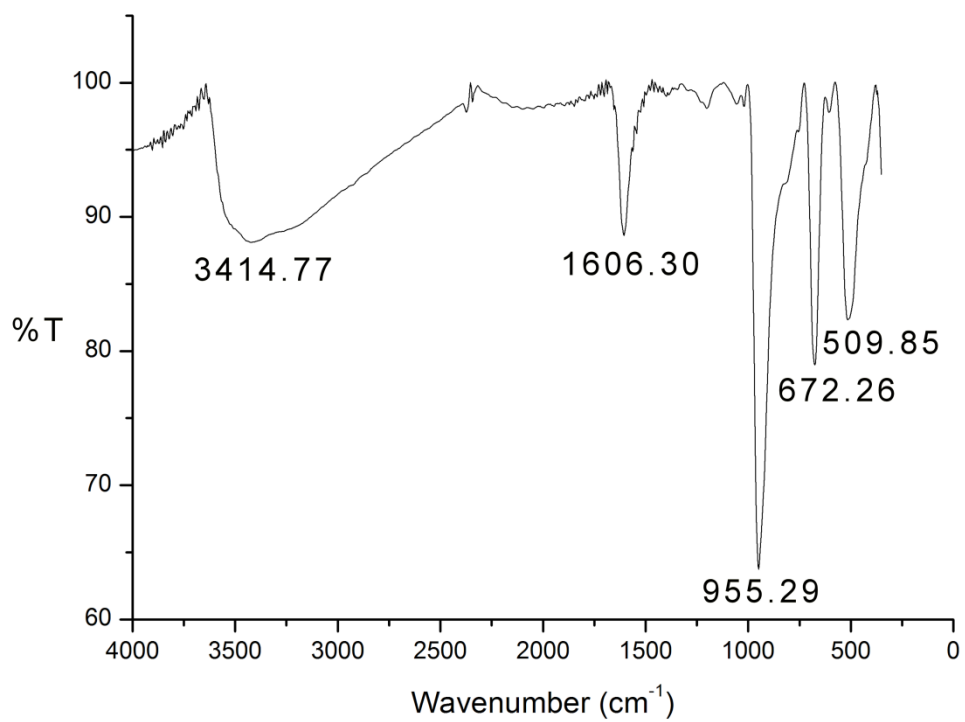

**Figure S3:** FT-IR Spectrum of Compound 3

## Thermogravimetric Analysis

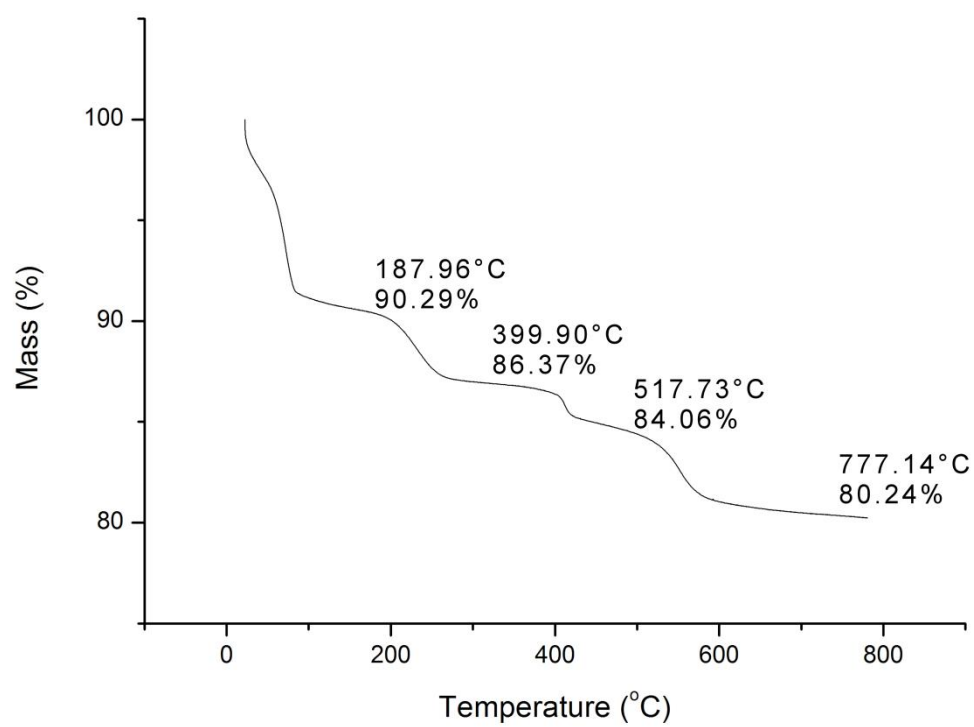

**Figure S4:** TGA trace of Compound 1

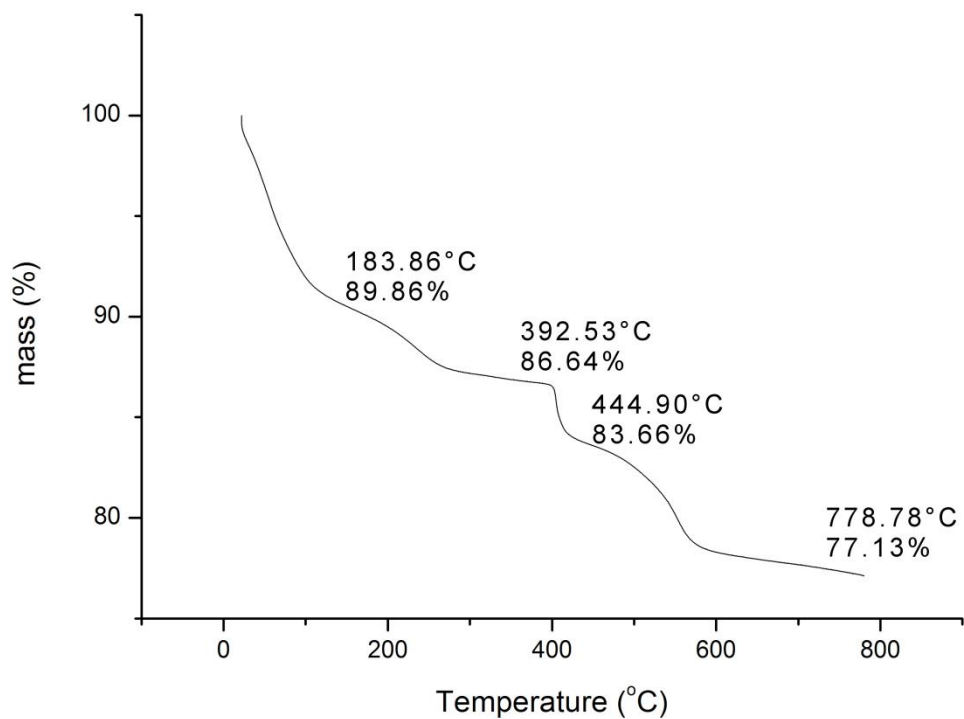

**Figure S5:** TGA trace of Compound 2

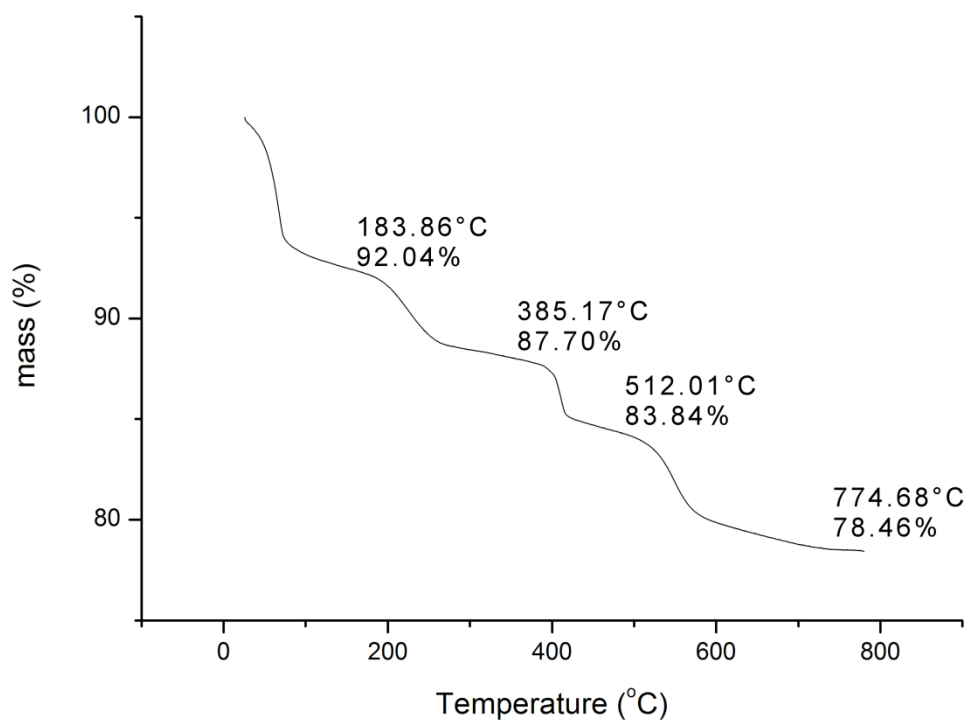

**Figure S6:** TGA trace of Compound 3

## ESI-Mass Spectrometry

We have employed electrospray ionisation mass spectrometry and performed the experiments in ion mobility mode in an effort to de-convolute and identify the species which correspond to the observed envelopes. Not only have we been able to use this technique to comment on the solution stability of each of the three compounds, we have also been able to confirm that they fragment into their fundamental building blocks which is indicative of the building block library stability.

Compound **1** revealed three envelopes tentatively assigned to the intact cluster centred at c.a. 1464.9, 1486.8 and 1502.8 m/z respectively (Table S1). In addition to this there are three further envelopes that we have assigned to the partially fragmented species derived from the loss of just one constituent part, such as a  $[\text{Mo}_2\text{O}_2\text{S}_2]^{2+}$  dimeric unit or a tellurite anion. Interestingly, there are two additional envelopes that are large enough to correspond to ion pairing of molecular species centred at 1491.9 and 1496.2 m/z which correspond to the dimeric and trimeric aggregates of compound **1**.

Finally, it was possible to identify the type A virtual building block which is used to construct the cluster and gave an envelope centred at 802.3 m/z. The building block can fragment further through the loss of  $[\text{Mo}_2\text{O}_2\text{S}_2]^{2+}$  dimeric units.

The mass spectrum of compound **2** suggests that this molecule is seemingly less stable than compound **1** under the employed ionization conditions (Table S2). There are still two envelopes that were assigned to compound **2** after removal one of the three virtual building blocks (ca. 959.2 m/z) while the other having lost only a single tellurite template (ca. 1347.32 m/z). What is clearer from this spectrum is the presence of the constituent building blocks in this molecule. B type building blocks occur fairly regularly, as do C type building blocks- however these could equally be D type building blocks since C and D give identical m/z values.

The mass spectrum for compound **3** hasn't revealed any envelopes that could be assigned to the intact cluster indicating lack of stability, under the experimental conditions (Table S3). However we were able to detect virtual building blocks or bigger fragments of the cluster.

Interestingly we were able to observe a fragment that can be assigned to a species that is half of the cluster **3** and gives an envelope centered at 1467.9 m/z. This view is further reinforced by the presence of four envelopes that can be assigned to one third of the full molecule. Finally, two envelopes correspond to type A building blocks with an additional dimeric unit.



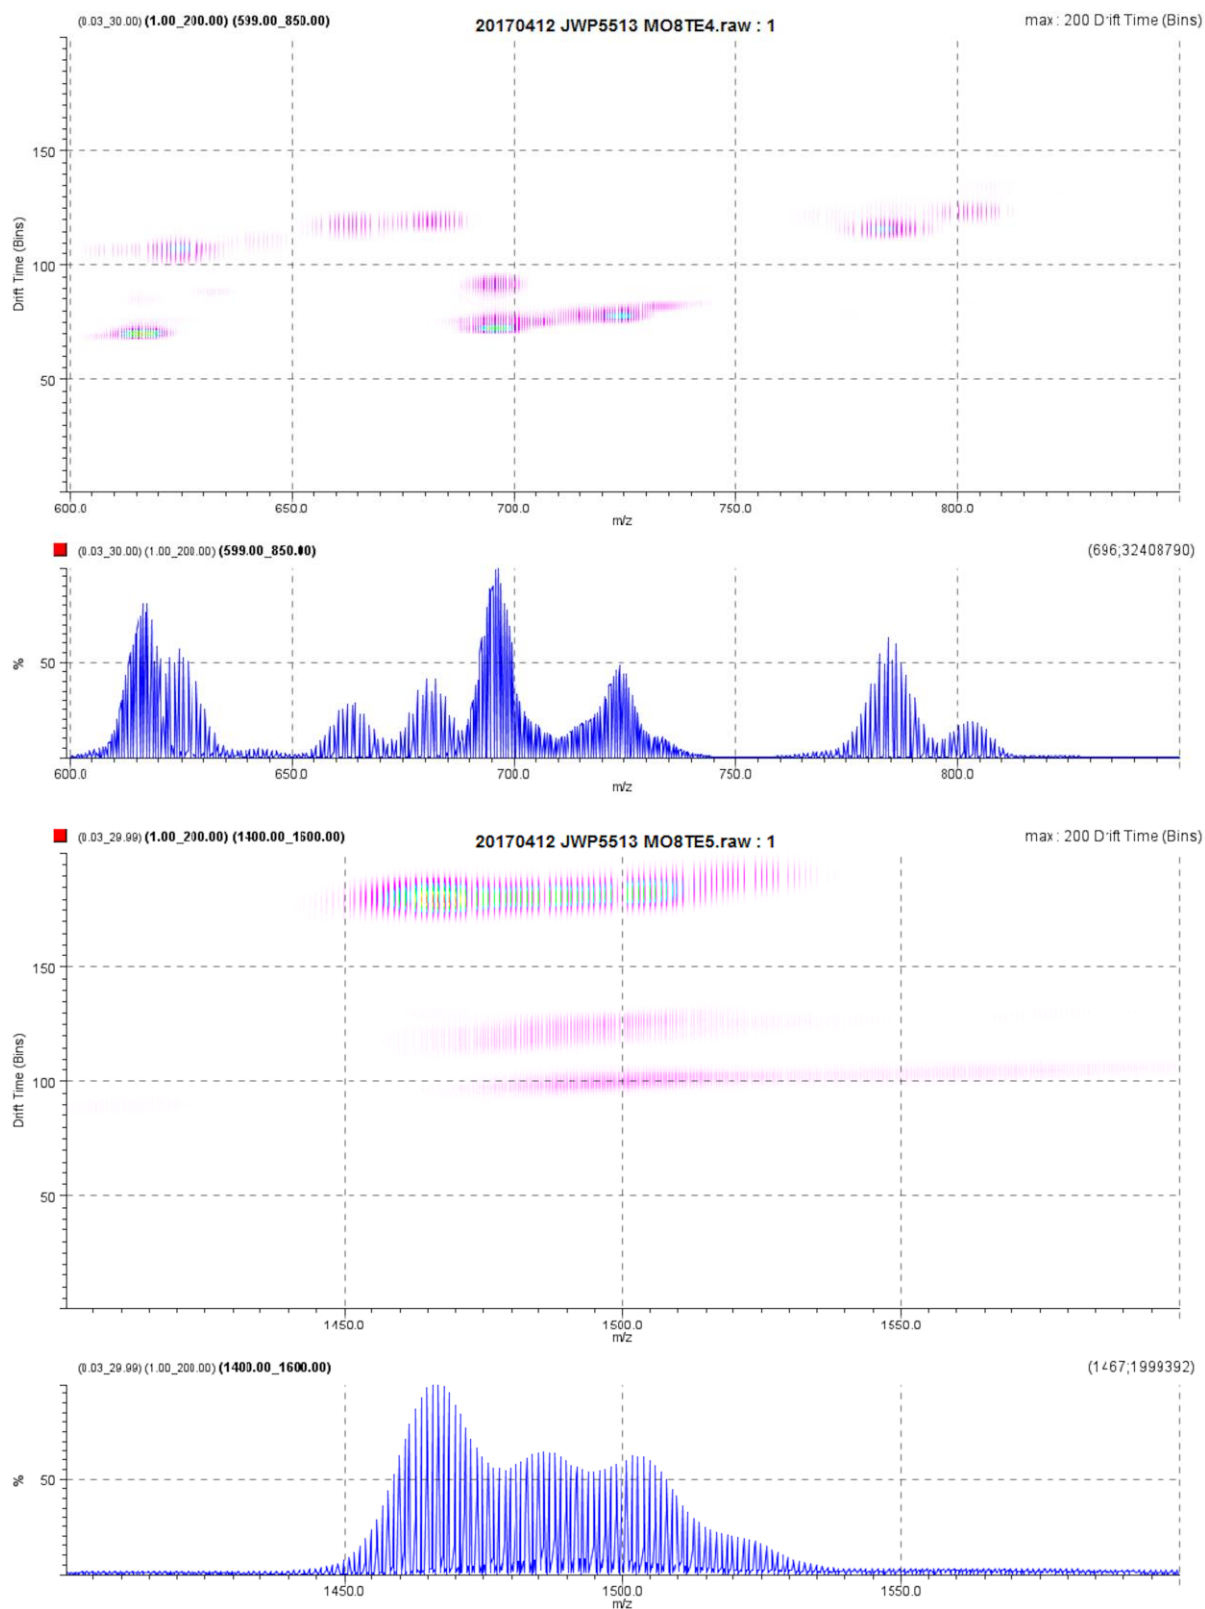

**Figure S7:** Ion Mobility ESI mass spectra for compound **1** (upper) and ESI mass spectra (lower)

**Table S1:** Ion Mobility Mass spectrometry peak assignments for Compound 1

| m/z     | z  | Assignment                                                                                                 | Calculated m/z | Comment                   |
|---------|----|------------------------------------------------------------------------------------------------------------|----------------|---------------------------|
| 616.48  | -2 | $\text{K}(\text{Mo}_2\text{O}_2\text{S}_2)_3(\text{TeO}_3)(\text{OH})_7(\text{H}_2\text{O})_2$             | 616.56         | Full molecule – 1 dimer   |
| 625.50  | -1 | $(\text{NMe}_4)(\text{Mo}_2\text{O}_2\text{S}_2)(\text{TeO}_3)(\text{OH})_2(\text{H}_2\text{O})_3$         | 625.77         | BB A – 1 dimer            |
| 663.44  | -1 | $(\text{NMe}_4)\text{K}(\text{Mo}_2\text{O}_2\text{S}_2)(\text{TeO}_3)(\text{OH})_3(\text{H}_2\text{O})_2$ | 663.72         | BB A – 1 dimer            |
| 681.45  | -1 | $(\text{NMe}_4)\text{K}(\text{Mo}_2\text{O}_2\text{S}_2)(\text{TeO}_3)(\text{OH})_3(\text{H}_2\text{O})_3$ | 681.73         | BB A – 1 dimer            |
| 695.43  | -2 | $(\text{Mo}_2\text{O}_2\text{S}_2)_3(\text{TeO}_3)_2(\text{OH})_4(\text{H}_2\text{O})_6$                   | 695.54         | BB A + TeO3 – 1 dimer     |
| 696.42  | -2 | $\text{K}(\text{Mo}_2\text{O}_2\text{S}_2)_3(\text{TeO}_3)_2(\text{OH})_5(\text{H}_2\text{O})_3$           | 696.51         | Molecule + TeO3 – 1 dimer |
| 724.41  | -2 | $(\text{Mo}_2\text{O}_2\text{S}_2)_4(\text{OH})_{10}(\text{H}_2\text{O})_7$                                | 724.54         | Full molecule – TeO3      |
| 784.38  | -1 | $\text{K}_4\text{Na}_2(\text{Mo}_2\text{O}_2\text{S}_2)(\text{TeO}_3)(\text{OH})_7$                        | 784.49         | BB A – 1 dimer            |
| 802.39  | -1 | $(\text{Mo}_2\text{O}_2\text{S}_2)_2(\text{TeO}_3)(\text{OH})_3$                                           | 802.39         | BB A                      |
| 1464.87 | -1 | $(\text{Mo}_2\text{O}_2\text{S}_2)_4(\text{TeO}_3)(\text{OH})_7(\text{H}_2\text{O})$                       | 1464.90        | Full molecule             |
| 1486.85 | -1 | $\text{Na}(\text{Mo}_2\text{O}_2\text{S}_2)_4(\text{TeO}_3)(\text{OH})_8$                                  | 1486.88        | Full molecule             |
| 1502.85 | -1 | $\text{K}(\text{Mo}_2\text{O}_2\text{S}_2)_4(\text{TeO}_3)(\text{OH})_8$                                   | 1502.86        | Full molecule             |
| 1491.85 | -2 | $(\text{Mo}_2\text{O}_2\text{S}_2)_8(\text{TeO}_3)_2(\text{OH})_{14}(\text{H}_2\text{O})_5$                | 1491.92        | 2 molecules               |
| 1496.18 | -3 | $\text{K}_2(\text{Mo}_2\text{O}_2\text{S}_2)_{12}(\text{TeO}_3)_3(\text{OH})_{23}(\text{H}_2\text{O})_2$   | 1496.21        | 3 molecules               |

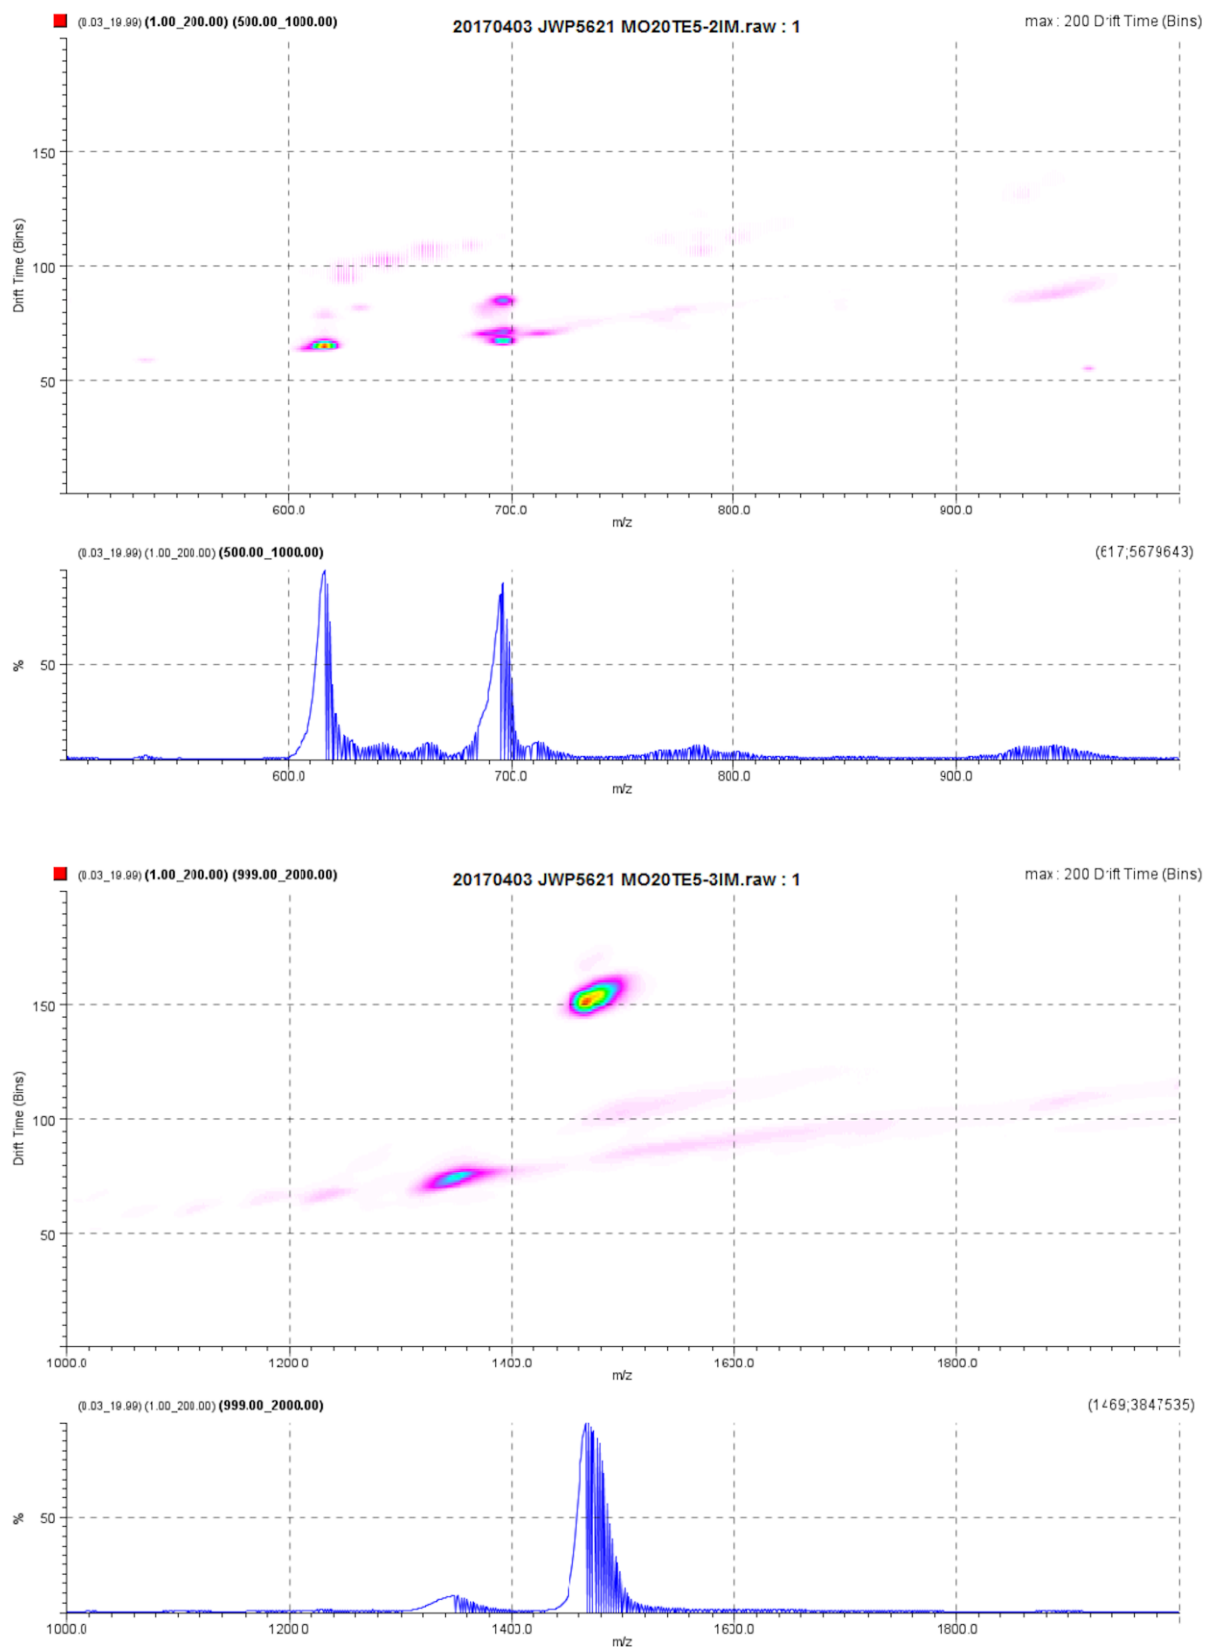

**Figure S8:** Ion Mobility ESI Mass spectra for Compound 2 (upper) and ESI mass spectra (lower)

**Table S2:** Ion Mobility mass spectrometry peak assignments for Compound **2**

| m/z     | z  | Assignment                                                                                                 | Calculated m/z | Comment                              |
|---------|----|------------------------------------------------------------------------------------------------------------|----------------|--------------------------------------|
| 616.50  | -2 | $\text{K}(\text{Mo}_2\text{O}_2\text{S}_2)_3(\text{TeO}_3)(\text{OH})_7(\text{H}_2\text{O})_2$             | 616.56         | BB B                                 |
| 625.51  | -1 | $(\text{NMe}_4)(\text{Mo}_2\text{O}_2\text{S}_2)(\text{TeO}_3)(\text{OH})_2(\text{H}_2\text{O})_3$         | 625.77         | BB A – 1 dimer                       |
| 643.51  | -1 | $(\text{NMe}_4)(\text{Mo}_2\text{O}_2\text{S}_2)(\text{TeO}_3)(\text{OH})_2(\text{H}_2\text{O})_4$         | 643.78         | BB A – 1 dimer                       |
| 663.47  | -1 | $(\text{NMe}_4)\text{K}(\text{Mo}_2\text{O}_2\text{S}_2)(\text{TeO}_3)(\text{OH})_3(\text{H}_2\text{O})_2$ | 663.72         | BB A – 1 dimer                       |
| 681.46  | -1 | $(\text{NMe}_4)\text{K}(\text{Mo}_2\text{O}_2\text{S}_2)(\text{TeO}_3)(\text{OH})_3(\text{H}_2\text{O})_3$ | 681.73         | BB A – 1 dimer                       |
| 695.45  | -2 | $(\text{Mo}_2\text{O}_2\text{S}_2)(\text{TeO}_3)_2(\text{OH})_4(\text{H}_2\text{O})_6$                     | 695.54         | BB C – 1 dimer                       |
| 696.45  | -2 | $\text{K}(\text{Mo}_2\text{O}_2\text{S}_2)_3(\text{TeO}_3)_2(\text{OH})_5(\text{H}_2\text{O})_3$           | 696.51         | BB C                                 |
| 696.94  | -2 | $\text{K}_2(\text{Mo}_2\text{O}_2\text{S}_2)_3(\text{OH})_6(\text{TeO}_3)_2$                               | 697.48         | BB C                                 |
| 712.45  | -2 | $\text{K}_4\text{Na}(\text{Mo}_2\text{O}_2\text{S}_2)_3(\text{TeO}_3)(\text{OH})_{11}(\text{H}_2\text{O})$ | 712.51         | BB B                                 |
| 945.29  | -2 | $(\text{Mo}_2\text{O}_2\text{S}_2)_4(\text{TeO}_3)_3(\text{OH})_4(\text{H}_2\text{O})_8$                   | 945.37         | BB C + {TeO <sub>3</sub> }           |
| 959.43  | -3 | $\text{K}_2(\text{Mo}_2\text{O}_2\text{S}_2)_7(\text{TeO}_3)_3(\text{OH})_{13}(\text{H}_2\text{O})_2$      | 959.29         | Molecule – BB C                      |
| 1348.03 | -3 | $\text{K}_3(\text{Mo}_2\text{O}_2\text{S}_2)_{10}(\text{TeO}_3)_4(\text{OH})_{18}(\text{H}_2\text{O})_2$   | 1347.32        | Full Molecule- 1 {TeO <sub>3</sub> } |
| 1466.95 | -1 | $\text{K}(\text{Mo}_2\text{O}_2\text{S}_2)_3(\text{TeO}_3)_2(\text{OH})_4(\text{H}_2\text{O})_8$           | 1466.07        | BB C                                 |

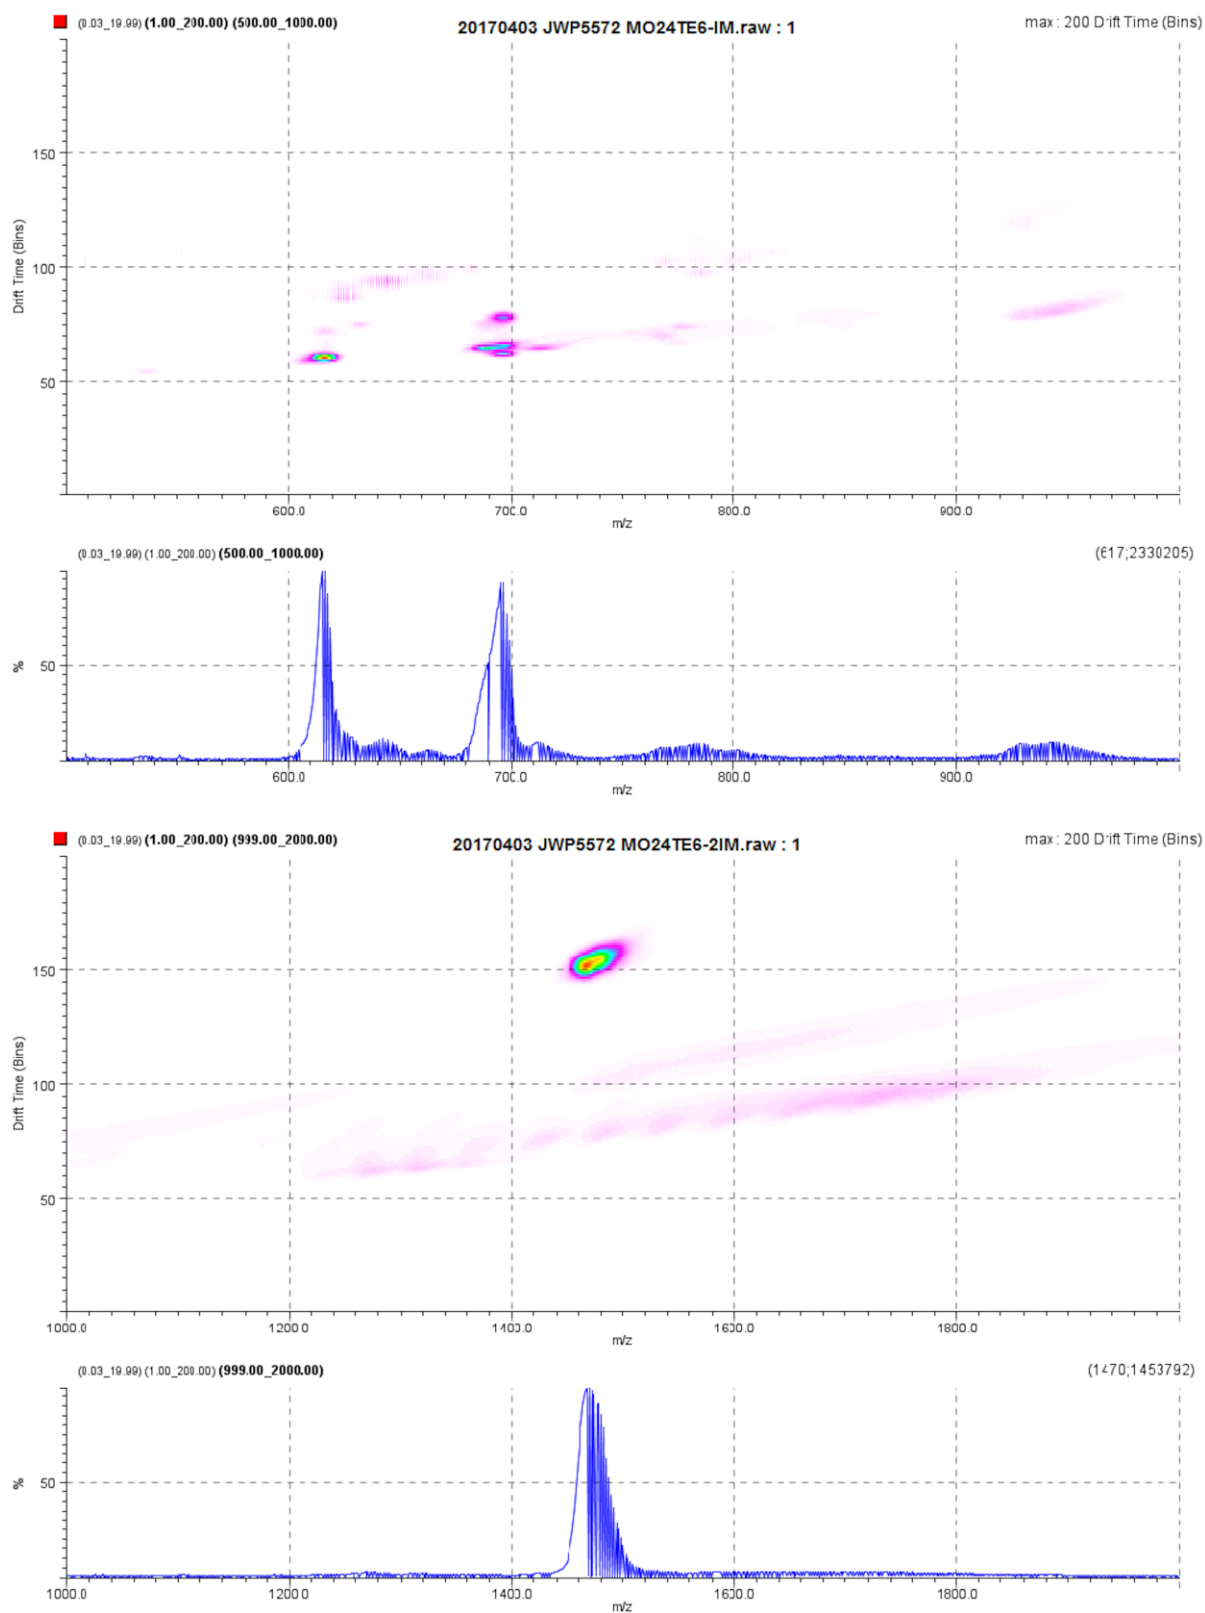

**Figure S9:** Ion Mobility ESI mass spectra for compound **3** (upper) and ESI mass spectra (lower)

**Table S3:** Ion Mobility ESI mass spectrometry peak assignments for compound **3**

| m/z     | z  | Assignment                                                                                                                                                                   | Calculated m/z | Comment                      |
|---------|----|------------------------------------------------------------------------------------------------------------------------------------------------------------------------------|----------------|------------------------------|
| 616.02  | -2 | $(\text{Mo}_2\text{O}_2\text{S}_2)_3(\text{TeO}_3)(\text{OH})_6(\text{H}_2\text{O})_5$                                                                                       | 615.60         | BB A + 1 dimer               |
| 625.52  | -1 | $(\text{NMe}_4)(\text{Mo}_2\text{O}_2\text{S}_2)(\text{TeO}_3)(\text{OH})_2(\text{H}_2\text{O})_3$                                                                           | 625.77         | BB A – 1 dimer               |
| 643.52  | -1 | $(\text{NMe}_4)(\text{Mo}_2\text{O}_2\text{S}_2)(\text{TeO}_3)(\text{OH})_2(\text{H}_2\text{O})_4$                                                                           | 643.78         | BB A – 1 dimer               |
| 664.49  | -1 | $\text{K}_2(\text{Mo}_2\text{O}_2\text{S}_2)(\text{TeO}_3)(\text{OH})_3(\text{H}_2\text{O})_4$                                                                               | 664.61         | BB A – 1 dimer               |
| 689.45  | -2 | $\text{KNa}(\text{Mo}_2\text{O}_2\text{S}_2)_3(\text{TeO}_3)_2(\text{OH})_6$                                                                                                 | 689.49         | 2x BB A – 1 dimer            |
| 696.46  | -2 | $\text{K}(\text{Mo}_2\text{O}_2\text{S}_2)_3(\text{TeO}_3)_2(\text{OH})_5(\text{H}_2\text{O})_3$                                                                             | 696.51         | 2x BB A – 1 dimer            |
| 776.30  | -2 | $(\text{Mo}_2\text{O}_2\text{S}_2)_4(\text{TeO}_3)(\text{OH})_8(\text{H}_2\text{O})_5$                                                                                       | 776.97         | 2x BB A - $\{\text{TeO}_3\}$ |
| 767.89  | -2 | $(\text{Mo}_2\text{O}_2\text{S}_2)_4(\text{TeO}_3)(\text{OH})_8(\text{H}_2\text{O})_4$                                                                                       | 767.97         | 2x BB A - $\{\text{TeO}_3\}$ |
| 946.30  | -2 | $\text{K}_2(\text{Mo}_2\text{O}_2\text{S}_2)_3(\text{TeO}_3)(\text{OH})_8(\text{H}_2\text{O})_2$                                                                             | 645.55         | BB A + 1 dimer               |
| 1467.98 | -2 | $\text{K}_2(\text{Mo}_2\text{O}_2\text{S}_2)_6(\text{Mo}^{\text{IV}}\text{Mo}^{\text{V}}\text{O}_2\text{S}_2)\text{H}(\text{TeO}_3)_3(\text{OH})_{12}(\text{H}_2\text{O})_6$ | 1466.96        | Half-Molecule + 1 dimer      |

## Crystallography Data

**Table S4:** Crystallographic Data for Compound 1

|                                    |                                                                                                     |
|------------------------------------|-----------------------------------------------------------------------------------------------------|
| Identification code                | JWP3361                                                                                             |
| Empirical formula                  | H <sub>29</sub> K <sub>3</sub> Mo <sub>8</sub> O <sub>30</sub> S <sub>8</sub> Te                    |
| Formula weight                     | 1778.13                                                                                             |
| Temperature                        | 150(2)K                                                                                             |
| Wavelength                         | 0.71073Å                                                                                            |
| Crystal system, space group        | Monoclinic, P 21/c                                                                                  |
| Unit cell dimensions               | a=10.0033(8)Å $\alpha$ =90°<br>b= 12.4181(11)Å $\beta$ =100.349(4)°<br>c=15.4775(13)Å $\gamma$ =90° |
| Volume                             | 1891.4(3)Å <sup>3</sup>                                                                             |
| Z, Calculated density              | 1, 3.122 Mg/m <sup>3</sup>                                                                          |
| Absorption coefficient             | 4.183mm <sup>-1</sup>                                                                               |
| F(000)                             | 1684                                                                                                |
| Crystal size                       | 0.100 x 0.080 x 0.060 mm <sup>3</sup>                                                               |
| $\theta$ range for data collection | 2.641 to 25.998°                                                                                    |
| Limiting indices                   | -12<=h<=12, -13<=k<=15, -15<=l<=19                                                                  |
| Reflections collected / unique     | 13784/ 3692                                                                                         |
| Completeness to $\theta$ = 25.242  | 99.4%                                                                                               |
| Absorption correction              | Empirical                                                                                           |
| Max. and Min. transmission         | 0.745 and 0.426                                                                                     |
| Refinement method                  | Full-Matrix Least Squares on F <sup>2</sup>                                                         |
| Data / restraints / parameters     | 3692/ 0/ 256                                                                                        |
| Goodness-of-fit on F <sup>2</sup>  | 1.220                                                                                               |
| R indices (all data)               | R1=0.0613, wR2=0.1314                                                                               |
| Extinction coefficient             | 0.00085(15)                                                                                         |
| Largest diff. peak and hole        | 1.42 and -1.79 e.Å <sup>-3</sup>                                                                    |

**Table S5:** Crystallographic Data for Compound **2**

|                                    |                                                                                                                     |
|------------------------------------|---------------------------------------------------------------------------------------------------------------------|
| Identification code                | JWP3422                                                                                                             |
| Empirical formula                  | H108 K8 Mo20 O98 S20 Te5                                                                                            |
| Formula weight                     | 5187.66                                                                                                             |
| Temperature                        | 150(2)K                                                                                                             |
| Wavelength                         | 0.71073Å                                                                                                            |
| Crystal system, space group        | Triclinic, $P\bar{1}$                                                                                               |
| Unit cell dimensions               | a=15.2433(10)Å $\alpha$ =107.582(4)°<br>b=18.1235(12)Å $\beta$ =95.258(4)°<br>c=25.9548(18)Å $\gamma$ = 108.882(3)° |
| Volume                             | 6323.3(8)Å <sup>3</sup>                                                                                             |
| Z, Calculated density              | 2, 2.725Mg/m <sup>3</sup>                                                                                           |
| Absorption coefficient             | 3.735mm <sup>-1</sup>                                                                                               |
| F(000)                             | 4928                                                                                                                |
| Crystal size                       | 0.100 x 0.080 x 0.070 mm <sup>3</sup>                                                                               |
| $\theta$ range for data collection | 1.675 to 25.999°                                                                                                    |
| Limiting indices                   | -18<=h<=19, -20<=k<=22, -32<=l<=32                                                                                  |
| Reflections collected / unique     | 91451/ 24762                                                                                                        |
| Completeness to $\theta$ = 25.242  | 99.7%                                                                                                               |
| Absorption correction              | Empirical                                                                                                           |
| Refinement method                  | Full Matrix Least Squares on F <sup>2</sup>                                                                         |
| Data / restraints / parameters     | 24762/0/1366                                                                                                        |
| Goodness-of-fit on F <sup>2</sup>  | 1.032                                                                                                               |
| R indices (all data)               | R1=0.0785, wR2=0.1492                                                                                               |
| Extinction coefficient             | 0.00019(3)                                                                                                          |
| Largest diff. peak and hole        | 2.46 and -2.48 e.Å <sup>-3</sup>                                                                                    |



**Table S6:** Crystallographic Data for Compound **3**

|                                    |                                                                                                                  |
|------------------------------------|------------------------------------------------------------------------------------------------------------------|
| Identification code                | ECL3832                                                                                                          |
| Empirical formula                  | C <sub>4</sub> H <sub>126</sub> N <sub>9</sub> Mo <sub>24</sub> O <sub>110</sub> S <sub>24</sub> Te <sub>6</sub> |
| Formula weight                     | 613.55                                                                                                           |
| Temperature                        | 150(2)K                                                                                                          |
| Wavelength                         | 0.71073Å                                                                                                         |
| Crystal system, space group        | Monoclinic, C 2/c                                                                                                |
| Unit cell dimensions               | a=33.906(3)Å $\alpha=90^\circ$<br>b=18.8942(16)Å $\beta=119.541(4)^\circ$<br>c=29.641(3)Å $\gamma=90^\circ$      |
| Volume                             | 16520(3)Å <sup>3</sup>                                                                                           |
| Z, Calculated density              | 4, 2.468 Mg/m <sup>3</sup>                                                                                       |
| Absorption coefficient             | 3.412mm <sup>-1</sup>                                                                                            |
| F(000)                             | 11648                                                                                                            |
| Crystal size                       | 0.100 x 0.080 x 0.070 mm <sup>3</sup>                                                                            |
| $\theta$ range for data collection | 1.673 to 26.000°                                                                                                 |
| Limiting indices                   | -41<=h<=41, -23<=k<=23, -36<=l<=36                                                                               |
| Reflections collected / unique     | 120222/ 16217                                                                                                    |
| Completeness to $\theta = 25.242$  | 99.9%                                                                                                            |
| Absorption correction              | Empirical                                                                                                        |
| Refinement method                  | Full Matrix Least Squares on F <sup>2</sup>                                                                      |
| Data / restraints / parameters     | 16217/ 0/ 848                                                                                                    |
| Goodness-of-fit on F <sup>2</sup>  | 1.025                                                                                                            |
| R indices (all data)               | R1=0.0847, wR2=0.1562                                                                                            |
| Extinction coefficient             | 0.000038(5)                                                                                                      |
| Largest diff. peak and hole        | 2.73 and -1.18 e.Å <sup>-3</sup>                                                                                 |

## References

- 1 E. Cadot, B. Salignac, S. Halut and F. Sécheresse, *Angew. Chem. Int. Ed.*, **1998**, *37*, 611-613
- 2 G. Sheldrick, *Acta. Cryst. A*, **1990**, *46*, 467-473
- 3 G. Sheldrick, *Acta. Cryst. A*, **2008**, *64*, 112-122
- 4 L. Farrugia, *J. Appl. Crystallogr.*, **1999**, *32*, 837-838
- 5 R. C. Clark and J. S. Reid, *Acta. Cryst. A*, **1995**, *51*, 887-897
